# Supplementary material
Source: PubMed Central journal article supplement (PMC8342606)
Supplement: ONCO-26-668-s001.pdf [file ONCO-26-668-s001.pdf]

Supplemental Table for:

Mismatch repair (MMR) gene alteration and BRAF V600E mutation are predictive biomarkers of immune checkpoint inhibitors in MMR-D colorectal cancer

Ibrahim Halil Sahin et al.

**Table 1S. Multivariate analysis with best selection method for PFS**

| Co-variate                 | Level   | N  | HR (95% CI)     | HR P-value | Overall P- value |
|----------------------------|---------|----|-----------------|------------|------------------|
| <b>BRAF V600E mutation</b> | Absent  | 31 | 0.32(0.11-0.93) | 0.036      | 0.036            |
|                            | Present | 9  |                 |            |                  |

\*Number of observations in the original data set = 60. Number of observations used = 40. \*\*Backward selection was used. The following variables were removed from the model: Gender, Side of Tumor, Tumor Volume, Age, G
